# Supplementary material for: Synthesis and in vivo behaviour of an exendin-4-based MRI probe capable of β-cell-dependent contrast enhancement in the pancreas
Source: Royal Society of Chemistry journal article supplement (doi:10.1039/d0dt00332h), 2020-01-01
Supplement: d0dt00332h1.pdf [file d0dt00332h1.pdf]

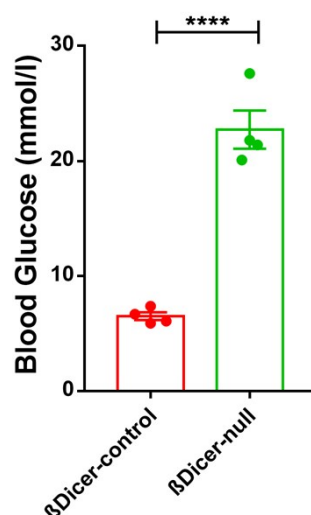

**Supplementary Figure 1:**  $\beta$ -cell-specific deletion of DICER ( $\beta$ Dicer-null) leads to hyperglycaemia. Glycemia after MRI in  $\beta$ Dicer-null (green) and littermate controls ( $\beta$ Dicer-ctrl, red). N = 4/genotype. Each dot represents a single mouse. \*\*\*\*p<0.0001, Student's t test.

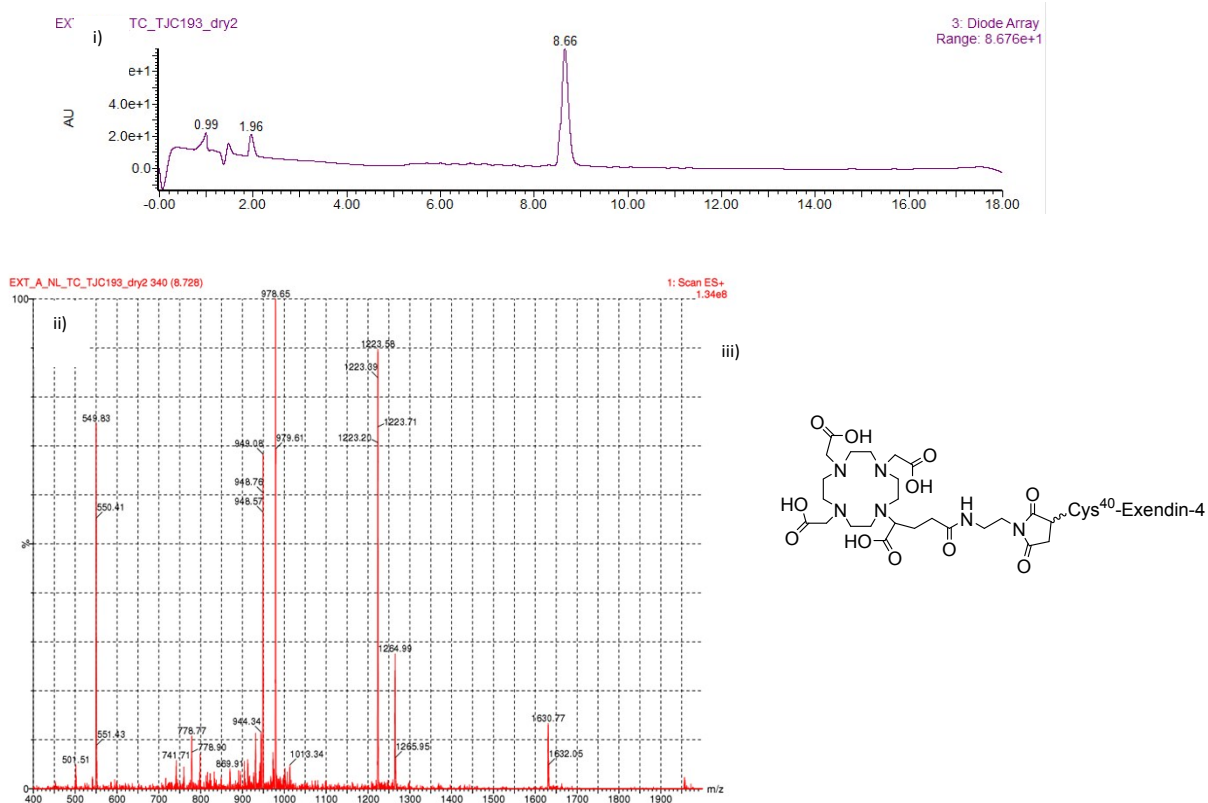

**Supplementary Figure 2:** Characterisation data (i) LCMS UV absorption trace (5% MeCN/95% H<sub>2</sub>O to 95% MeCN/5%H<sub>2</sub>O), (ii) MS of the peak with retention time of 8.66 minutes showing the [M]<sup>3+</sup>, [M]<sup>4+</sup> and [M]<sup>5+</sup> peaks at m/z = 1630.99, 1223.58 and 978.65 respectively) and (iii) structure of the free ligand, compound 1.

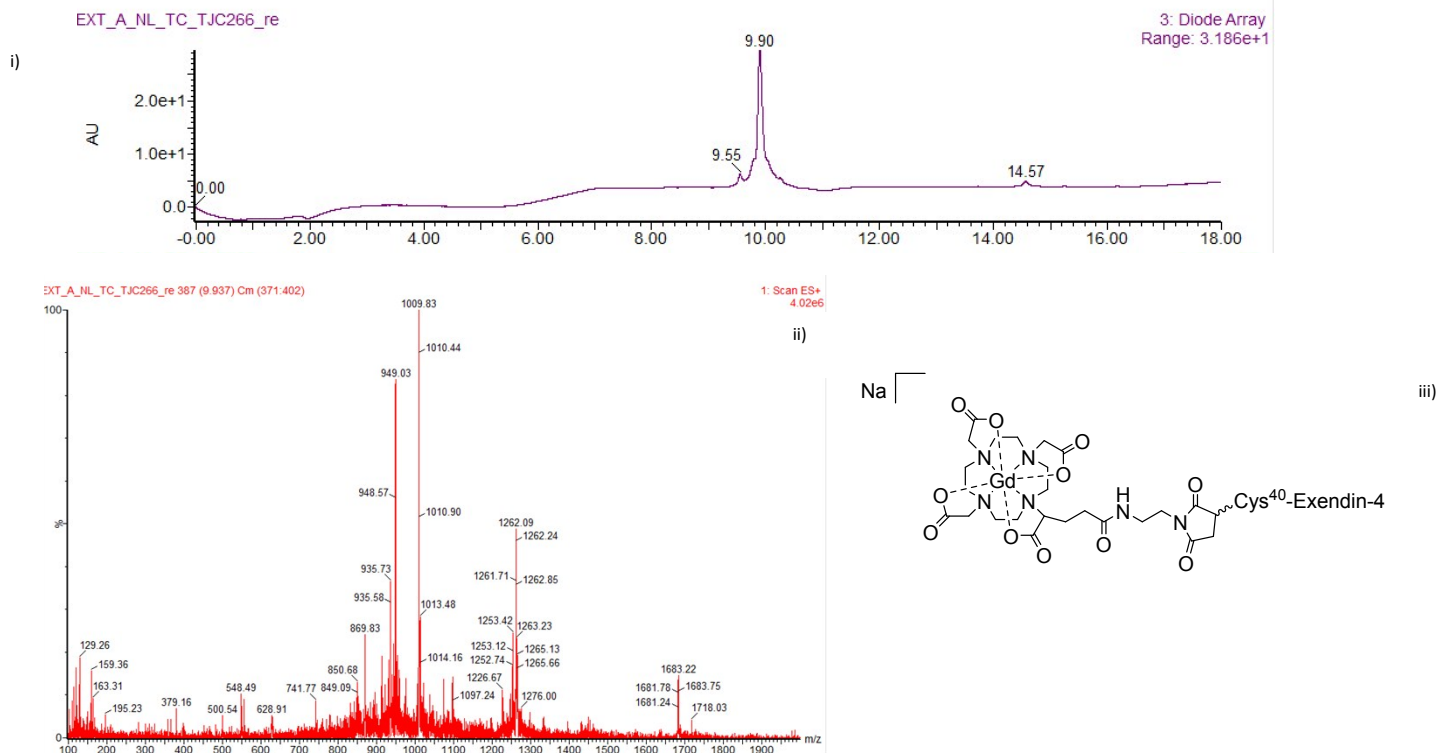

**Supplementary Figure 3:** Characterisation data (i) LCMS UV absorption trace (5% MeCN/95% H<sub>2</sub>O to 95% MeCN/5%H<sub>2</sub>O), (ii) MS of the peak with retention time of 9.90 minutes showing the [M]<sup>3+</sup>, [M]<sup>4+</sup> and [M]<sup>5+</sup> peaks at  $m/z$  = 1683.22, 1262.09 and 1009.83 respectively) and (iii) structure of **GdEx**.

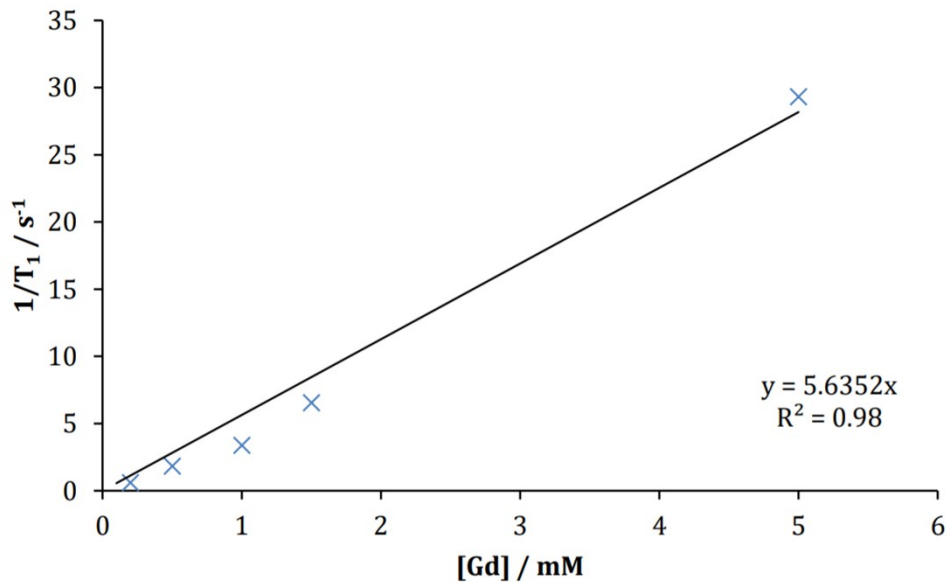

**Supplementary Figure 4:** Plot of  $1/T_1$  against concentration of gadolinium, [Gd] which was used to calculate the relaxivity of **GdEx**.

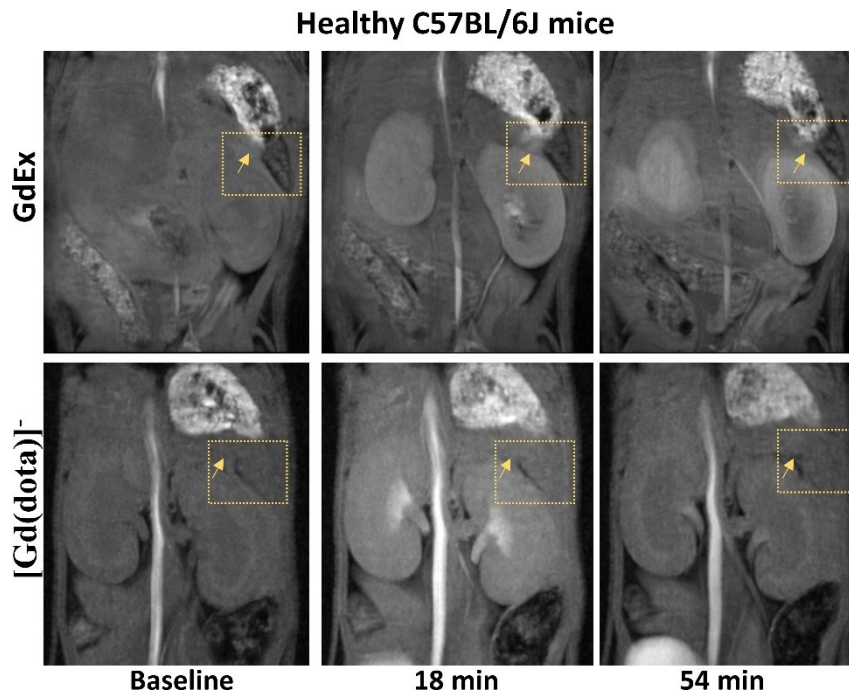

**Supplementary Figure 5:** Representative abdominal MRI of healthy C57BL/6J mouse before (baseline), 18 min. and 54 min. after **GdEx** (upper panel) and  $[Gd(dota)]^{3-}$  (lower panel) injection. The yellow square highlights the location of the pancreas and spleen. Note the increased contrast of the pancreas relative to the baseline linked to **GdEx** binding to the  $\beta$ -cell GLP-1R receptors *via* the extendin-4 moiety (yellow arrow). After  $[Gd(dota)]^{3-}$  injection, the pancreas exhibits a low contrast accumulation, followed by rapid overall clearance from most tissues (pancreas, liver, spleen) suggested by the increased contrast in the bladder at later time points.

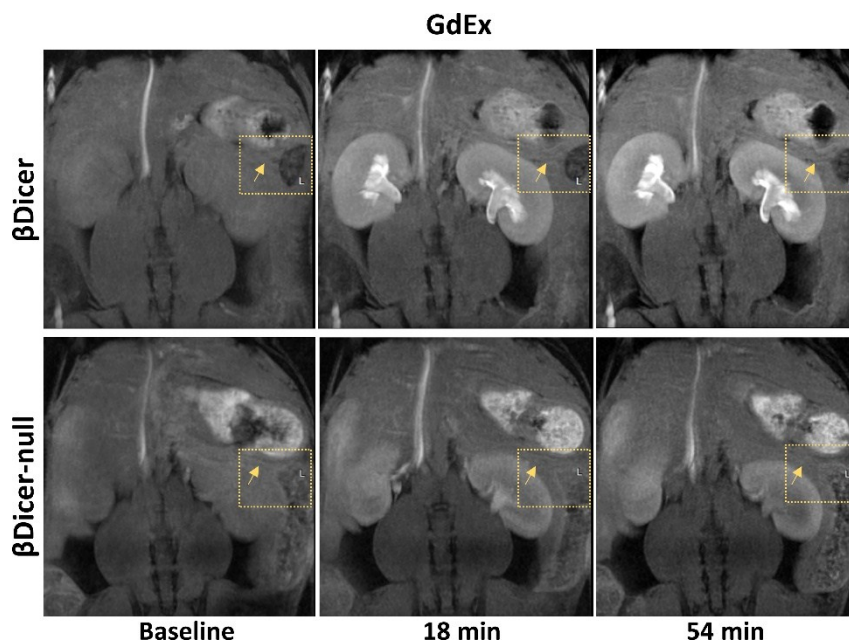

**Supplementary Figure 6:** Representative abdominal MRI of  $\beta$ Dicer-control and  $\beta$ Dicer-null mice before (baseline), 18 min. and 54 min. after **GdEx** injection. The  $T_1$  contrast in the pancreas of  $\beta$ Dicer-null mice is weaker compared to the  $\beta$ Dicer-control mice (yellow arrow). The yellow square highlights the location of the pancreas and spleen.
